# Supplementary material for: Gender Comparisons and Associations between Lower Limb Muscle Activation Strategies and Resultant Knee Biomechanics during Single Leg Drop Landings
Source: MDPI journal article supplement (doi:10.3390/biomechanics2040044), 2022-11-01
Supplement: s1 [file s1]

Archive with 1 entries (1 files):
- biomechanics-1867439-supplementary.pdf
